# Supplementary material for: The Effects of Propafenone on Postoperative Atrial Fibrillation in Adult Patients Undergoing Cardiac Surgery: A Meta‐Analysis of Randomized Controlled Trials
Source: Hindawi journal article supplement (doi:10.1155/2024/5579727), 2024-01-01
Supplement: f1 [file 5579727.f1.pdf]

**Table 1.** Database search strategies

| Search strategies                                                                                                                                                                                                                                                                                                                                                                                                                                                                                                                                                                                                                                                                                                 | Results |
|-------------------------------------------------------------------------------------------------------------------------------------------------------------------------------------------------------------------------------------------------------------------------------------------------------------------------------------------------------------------------------------------------------------------------------------------------------------------------------------------------------------------------------------------------------------------------------------------------------------------------------------------------------------------------------------------------------------------|---------|
| <p><b>Pubmed</b></p> <p>(((((propafenone AND (randomizedcontrolledtrial[Filter])) AND (cardiac surgery) AND (randomizedcontrolledtrial[Filter])) OR ((propafenone AND (randomizedcontrolledtrial[Filter])) AND (cardiopulmonary bypass) AND (randomizedcontrolledtrial[Filter])) OR ((propafenone AND (randomizedcontrolledtrial[Filter])) AND (coronary artery bypass grafting) AND (randomizedcontrolledtrial[Filter])) OR ((propafenone AND (randomizedcontrolledtrial[Filter])) AND (valve surgery) AND (randomizedcontrolledtrial[Filter])) OR ((propafenone AND (randomizedcontrolledtrial[Filter])) AND (aortic surgery) AND (randomizedcontrolledtrial[Filter])) Filters: Randomized Controlled Trial</p> | 5/15    |
| <p><b>Medline</b></p> <p>( propafenone and coronary artery bypass grafting ) OR ( propafenone and cardiac surgery ) OR ( propafenone and aortic surgery ) OR ( propafenone and valve surgery ) OR ( propafenone and cardiopulmonary bypass )</p>                                                                                                                                                                                                                                                                                                                                                                                                                                                                  | 0/13    |
| <p><b>Cochrane</b></p> <p>((propafenone)[Title/Abstract/Keyword] AND (cardiac surgery)[Title/Abstract/Keyword]) OR ((propafenone)[Title/Abstract/Keyword] AND (cardiopulmonary bypass)[Title/Abstract/Keyword]) OR ((propafenone)[Title/Abstract/Keyword] AND (coronary artery bypass)[Title/Abstract/Keyword]) OR ((propafenone)[Title/Abstract/Keyword] AND (valve surgery) [Title/Abstract/Keyword]) OR ((propafenone)[Title/Abstract/Keyword] AND (aortic surgery) [Title/Abstract/Keyword]) AND [trial]/lim)</p>                                                                                                                                                                                             | 2/26    |
| <p><b>Embase</b></p> <p>(' (propafenone) and (cardiac surgery) ' OR ( (propafenone) and (cardiac AND surgery) )) AND 'randomized controlled trial'/de OR ( (propafenone) and (coronary AND artery AND bypass AND grafting) AND 'randomized controlled trial'/de) OR ( (propafenone) and (valve AND surgery) AND 'randomized controlled trial'/de) OR ( (propafenone) and (aortic AND surgery) AND 'randomized controlled trial'/de) OR ( (propafenone) and (cardiopulmonary AND bypass) and AND 'randomized controlled trial'/de)</p>                                                                                                                                                                             | 0/38    |
| <p><b>CNKI</b></p> <p>((propafenone)[All field]) AND ((cardiac surgery)[All field] OR (cardiopulmonary bypass)[All field] OR (coronary artery bypass)[All field] OR (valve surgery)[All field] OR (aorta)[All field]))</p>                                                                                                                                                                                                                                                                                                                                                                                                                                                                                        | 1/4     |
| <p><b>Wan Fang</b></p> <p>SU=(propafenone)[All field]) AND SU=((cardiac surgery)[All field] OR (cardiopulmonary bypass)[All field] OR (coronary artery bypass)[All field] OR (valve surgery)[All field] OR (aortic surgery)[All field] )) AND SU=(random)</p>                                                                                                                                                                                                                                                                                                                                                                                                                                                     | 1/6     |
